# Supplementary material for: Identification of Flowering Regulatory Networks and Hub Genes Expressed in the Leaves of Elymus sibiricus L. Using Comparative Transcriptome Analysis
Source: Front Plant Sci. 2022 May 16;13:877908. doi: 10.3389/fpls.2022.877908 (PMC9150504; doi:10.3389/fpls.2022.877908)
Supplement: Supplementary Table 1 — The origin of 66 E. siburicus accessions. [file Table_1.XLSX]

## Sheet: Sheet1
Code	Materials	Origin	Status	Longitude	Latitude	Altitude/m
1	PI499614	Tian Lake, Xinjiang, China	wild material	88.14E	43.89N	1900
2	PI499617	Tian Lake, Xinjiang, China	wild material	87.95E	43.88N	1350
3	PI499620	Urumqi, Xinjiang, China	wild material	87.61E	43.83N	1850
4	PI504462	Xining, Qinghai, China	wild material	101.77E	36.61N	-
5	PI531665	Beijing, China	wild material	116.02E	40.36N	-
6	PI531668	China	wild material	-	-	-
7	PI531669	Xining, Qinghai, China	wild material	101.70E	36.61N	2400
8	PI531671	Gansu, China	cultivated material	-	-	2600
9	PI531675	China	wild material	-	-	-
10	PI595149	Xinjiang, China	wild material	84.57E	44.17N	1500
11	PI595156	Xinjiang, China	wild material	81.12E	45.03N	1300
12	PI595162	Xinjiang, China	wild material	87.97E	44.12N	1680
13	PI595169	Xinjiang, China	wild material	89.45E	43.77N	1300
14	PI595174	Xinjiang, China	wild material	89.30E	43.68N	1870
15	PI595180	Xinjiang, China	wild material	87.85E	43.80N	1600
16	PI595182	Xinjiang, China	wild material	87.87E	43.85N	1250
17	PI598479	Russian Federation	wild material	87.71E	51.50N	1368
18	PI598773	Kazakhstan	wild material	-	-	-
19	PI598776	Far East, Russia	wild material	-	-	-
20	PI598778	Kazakhstan	wild material	-	-	-
21	PI598780	Far East, Russia	wild material	-	-	-
22	PI598781	Baikal, Buryat, Russia	wild material	103.68E	51.48N	-
23	PI598782	Baikal, Buryat, Russia	wild material	105.62E	52.45N	-
24	PI598783	Baikal, Buryat, Russia	wild material	109.95E	55.77N	-
25	PI610876	-	-	-	-	-
26	PI610886	Dzuunburen, Mongolia	wild material	105.67E	49.96N	920
27	PI634228	Russian Federation	wild material	-	-	1250
28	PI634231	Mongolia	wild material	112.35E	47.58N	747
29	PI636676	Xiahe, Gansu, China	wild material	102.65E	35.19N	2720
30	PI639859	Sichuan, China	wild material	102.60E	33.10N	3320
31	PI655092	Mongolia	wild material	94.96E	49.80N	1370
32	PI655097	Mongolia	wild material	89.66E	48.88N	1817
33	PI655140	Urumqi, Xinjiang, China	wild material	-	-	1650
34	PI655199	Hongyuan, Sichuan, China	wild material	102.57E	32.08N	3280
35	PI659928	Balykchy, Kyrgyzstan	wild material	76.37E	42.32N	1664
36	PI659930	Kochkorka, Kyrgyzstan	wild material	75.72E	41.71N	2438
37	PI659942	Kochkorka, Kyrgyzstan	wild material	75.45E	41.73N	2627
38	PI665507	Mongolia	wild material	108.66E	48.12N	1524
39	W610305	Siberia, Russian	wild material	-	-	-
40	W630476	Kyrgyzstan	wild material	-	-	-
41	HZ01	Hezuo, Gansu, China	wild material	102.52E	35.06N	2715
42	HZ03	Hezuo, Gansu, China	wild material	102.55E	34.55N	3011
43	LT01	Lintan, Gansu, China	wild material	103.33E	34.42N	2889
44	LT02	Lintan, Gansu, China	wild material	103.37E	34.45N	3010
45	LT03	Lintan, Gansu, China	wild material	102.38E	34.33N	3032
46	LT04	Lintan, Gansu, China	wild material	103.39E	34.55N	2571
47	LT05	Lintan, Gansu, China	wild material	103.39E	34.56N	2336
48	LQ01	Luqu, Gansu, China	wild material	102.28E	34.35N	3010
49	LQ02	Luqu, Gansu, China	wild material	102.54E	34.59N	2999
50	LQ03	Luqu, Gansu, China	wild material	102.38E	34.33N	3032
51	LQ04	Luqu, Gansu, China	wild material	102.39E	34.30N	3023
52	LQ05	Luqu, Gansu, China	wild material	102.39E	34.31N	3030
53	LQ06	Luqu, Gansu, China	wild material	102.33E	34.34N	3095
54	LQ09	Luqu, Gansu, China	wild material	102.21E	34.29N	3481
55	LQ10	Luqu, Gansu, China	wild material	102.37E	34.05N	3389
56	SC01	Ruoergai, Sichuan, China	wild material	-	-	-
57	SC02	Ruoergai, Sichuan, China	wild material	-	-	-
58	SC03	Ruoergai, Sichuan, China	wild material	-	-	-
59	XH02	Xiahe, Gansu, China	wild material	102.49E	35.13N	2510
60	XH03	Xiahe, Gansu, China	wild material	102.33E	35.11N	2896
61	ZhN01	Zhuoni, Gansu, China	wild material	103.01E	34.51N	3218
62	ZhN02	Zhuoni, Gansu, China	wild material	103.15E	34.45N	3037
63	ZhN04	Zhuoni, Gansu, China	wild material	103.32E	34.33N	2596
64	ZhN05	Zhuoni, Gansu, China	wild material	103.36E	34.34N	2501
65	ZhN06	Zhuoni, Gansu, China	wild material	103.37E	34.46N	2678
66	ZhN07	Zhuoni, Gansu, China	wild material	102.25E	34.58N	2933
