# Supplementary material for: Identification of Flowering Regulatory Networks and Hub Genes Expressed in the Leaves of Elymus sibiricus L. Using Comparative Transcriptome Analysis
Source: Front Plant Sci. 2022 May 16;13:877908. doi: 10.3389/fpls.2022.877908 (PMC9150504; doi:10.3389/fpls.2022.877908)
Supplement: Supplementary Table 2 — The primers information of E. siburicus. [file Table_2.XLSX]

## Sheet: Sheet1
The primers of transcriptome data validation by qRT-PCR
Gene ID	Gene name	Forward Primer	Reverse Primer
TRINITY_DN34647_c3_g2	LF	CCGTCGACGTTCCCAATC	TGTGGAGGCGCGTAGTA
TRINITY_DN37852_c1_g2	CIGR	GTCGTTCAGGTACTTCTCGATG	GGGCTCCATCAACATCTTCT
TRINITY_DN34476_c0_g1	CCR2	TACATCTGCGGTGCATACC	GCTCATCATCCTGTCGTCTT
TRINITY_DN46383_c0_g2	CRY	GTCAGGCCATTCAGATCCTTAT	GATGACTGGGAGAGCTGATTC
TRINITY_DN38990_c0_g1	COL	GGACACTATCTTGGGCTCATTC	CGCTGGTTCTCGACAGTTT
TRINITY_DN33680_c1_g1	FPF1	GCATGCTCAGGTTCCACAA	TAGACGTCGATGACACGGAA
TRINITY_DN44255_c0_g1	FT	ACCTGAGGATGGGCTTCT	GGTAGTTGGCGAAGTTGGT
TRINITY_DN34261_c0_g3	HD3	CTTCGTGCTCGTGCTCTT	CGCTGGCAGTTGAAGTAGA
TRINITY_DN13097_c0_g2	FLT	GATTGGCGGCGACGATATTA	GATATTCCCTCAAGGTCGGATTG
TRINITY_DN38433_c0_g1	FLK	CACCACAACCTGACAGCATA	GGTGACCATGCACGGATATAA
TRINITY_DN29695_c0_g1	GID1	TGAAACGAAACGGAAACGAAAG	AAGACGCGACCGAAAGATG
TRINITY_DN40889_c0_g2	COL4	GCTATACCTCTCCAGGCATTT	ATCACGACGGCTATCAGTTC
reference gene	PP2A	GTTCGCCTCCTTCGTGATAA	CGGCAGAATGTGCTGAATTG
The primers of flowering candidate genes expression analysis
Gene ID	Gene name	Forward Primer	Reverse Primer
TRINITY_DN49210_c1_g1	CCA1	TCCATTTGTCCCAGTTCCTAC	GCTACTTGGCATTCCTTCG
TRINITY_DN29408_c0_g1	GHD7	GCAACCCGATCACTTCCGC	CGACGCCACTCGGGCCAG
TRINITY_DN33680_c1_g1	FPF1	GGTGGTGAAGCTGGTGGAG	GCGCGACGAGCTTGCGCTC
TRINITY_DN43102_c0_g3	FPA	CCTTACAAGTTTGCGAATGC	TATTGGACCATCCTGAGGG
TRINITY_DN34261_c0_g3	HD3	AGGAGGTGATGTGCTACGAGAG	CCTGGTGTTGAAGTTCTGGC
TRINITY_DN38995_c1_g1	VIN3	GGTGGGTTAGGGATGTGTTC	TTTGAGTCCTCGCTTAGGC
TRINITY_DN43569_c1_g2	ELF3	TTGGTGAGGCAGAAGGACTG	CCACATTATCAACCCTGAAGC
TRINITY_DN46383_c0_g2	CRY	ACTTCTGGGACACCTTGCTG	GCCTTCAAACTGTGGGTTG
TRINITY_DN38990_c0_g1	COL	ATTTACCGTGCCTACGCTG	ATGACCATCCTCACCAACG
TRINITY_DN38433_c0_g1	FLK	TGGGTTACTCAAATGGTCAGG	AGAGCAAGTGGCATCGTCAC
TRINITY_DN29695_c0_g1	GID1	GCAGCAACAGTGTGAGAGTG	CAAAGAAATGGGAGGATTCC
TRINITY_DN40889_c0_g2	COL4	GCCACAGTATGAGCATTTGG	ATCCTCCACTCTCGTGTTGC
reference gene	PP2A	GAAGAAAGAACCAGGAAGGAAC	GCTCTACACCACCAACATAAGG
