# Supplementary material for: Identification of Flowering Regulatory Networks and Hub Genes Expressed in the Leaves of Elymus sibiricus L. Using Comparative Transcriptome Analysis
Source: Front Plant Sci. 2022 May 16;13:877908. doi: 10.3389/fpls.2022.877908 (PMC9150504; doi:10.3389/fpls.2022.877908)
Supplement: Supplementary Table 3 — Sequencing data evaluation statistics in E. sibiricus. [file Table_3.XLSX]

## Sheet: Sheet1
Samples	Pair-end Reads	Clean Data			Mapped Reads
		Base Number	GC (%)	≥Q30 (%)	Total Reads	Mapped Ratio (%)
L1B	25932410	7750294127	55	91.89	16212112	78.33
L1F	22434620	6707967139	54.66	92.45	16037181	80.04
L1H	24514191	7323542238	54.57	92.57	15350252	79.71
L2B	24413362	7299112595	54.95	91.91	17037022	76.37
L2F	23850903	7129100793	55.02	91.89	16129889	79.68
L2H	22740941	6797994797	55.08	92.12	19368713	75.91
L3B	21136449	6318771598	55.39	92.24	17488566	79.12
L3F	19622259	5865973136	55.23	91.56	17466644	80
L3H	22295393	6661630399	54.36	92.92	16883705	78.47
E1B	20698443	6179160559	54.7	93.05	20493331	79.03
E1F	20037335	5978908353	54.73	93.21	17452552	77.79
E1H	19257493	5743216226	54.37	93.5	19597880	79.95
E2B	22308979	6668903718	54.14	91.84	18724141	76.7
E2F	20242122	6042476943	55.55	93.01	18393969	77.12
E2H	25515743	7627765527	55.83	92.08	17514876	77.02
E3B	22105078	6587063697	54.97	93.55	16411041	77.64
E3F	21832244	6520183220	55.45	92.82	14818650	75.52
E3H	21515265	6428736728	55.5	92.47	17731242	79.53
