# Supplementary material for: Identification of Flowering Regulatory Networks and Hub Genes Expressed in the Leaves of Elymus sibiricus L. Using Comparative Transcriptome Analysis
Source: Front Plant Sci. 2022 May 16;13:877908. doi: 10.3389/fpls.2022.877908 (PMC9150504; doi:10.3389/fpls.2022.877908)
Supplement: Supplementary Table 4 — The statistics of unigenes annotation in E. sibiricus. [file Table_4.XLSX]

## Sheet: Sheet1
Supplementary Table S4 The statistics of unigenes annotation in E. sibiricus
注释数据库	Unigene 数量	比例 (%)	300<=length<1000	length>=1000
Annotated databases	Unigene number	Percentage (%)
COG	15597	8.44	5283	7994
GO	48508	26.26	20032	20449
KEGG	12379	6.7	5058	5236
KOG	37405	20.25	15285	15428
Pfam	41919	22.69	15898	19984
Swiss-Prot	42321	22.91	17286	19187
TrEMBL	90201	48.83	41203	32189
nr	83698	45.31	37462	30895
nt	161713	87.54	77312	39503
All	166071	89.9	79199	39922
