# Supplementary material for: Identification of Flowering Regulatory Networks and Hub Genes Expressed in the Leaves of Elymus sibiricus L. Using Comparative Transcriptome Analysis
Source: Front Plant Sci. 2022 May 16;13:877908. doi: 10.3389/fpls.2022.877908 (PMC9150504; doi:10.3389/fpls.2022.877908)
Supplement: Supplementary Table 5 — The information of flowering pathway genes. [file Table_5.XLSX]

## Sheet: Sheet1
	Gene name	Gene ID	Pathway
1	VIN3	TRINITY_DN38995_c1_g1	Vernalization
2	VIN3	TRINITY_DN70542_c0_g1	Vernalization
3	VIN3	TRINITY_DN43266_c2_g3	Vernalization
4	VIN3	TRINITY_DN5803_c0_g1	Vernalization
5	VIN3	TRINITY_DN18211_c0_g1	Vernalization
6	VIN3	TRINITY_DN45223_c2_g2	Vernalization
7	CRY1	TRINITY_DN46383_c0_g2	Photoperiod
8	CRY4	TRINITY_DN69305_c0_g1	Photoperiod
9	CRY1	TRINITY_DN49031_c2_g1	Photoperiod
10	CRY1	TRINITY_DN46383_c0_g1	Photoperiod
11	ELF	TRINITY_DN46520_c2_g1	Photoperiod
12	ELF3	TRINITY_DN43088_c1_g4	Photoperiod
13	ELF3	TRINITY_DN43569_c1_g1	Photoperiod
14	FPF1	TRINITY_DN44255_c2_g3	Photoperiod
15	FPF1	TRINITY_DN33680_c1_g6	Photoperiod
16	FPF1	TRINITY_DN37380_c1_g1	Photoperiod
17	FPF1	TRINITY_DN33680_c1_g7	Photoperiod
18	FPF1	TRINITY_DN33680_c1_g1	Photoperiod
19	FPF1	TRINITY_DN33680_c1_g3	Photoperiod
20	FPF1	TRINITY_DN33680_c0_g1	Photoperiod
21	FPF1	TRINITY_DN33680_c1_g4	Photoperiod
22	FPF1	TRINITY_DN39169_c2_g1	Photoperiod
23	FPF1	TRINITY_DN39313_c3_g5	Photoperiod
24	FPF1	TRINITY_DN44255_c2_g2	Photoperiod
25	FPF1	TRINITY_DN46865_c0_g1	Photoperiod
26	LF	TRINITY_DN34647_c3_g2	Photoperiod
27	EF	TRINITY_DN40250_c0_g1	Photoperiod
28	FIE1	TRINITY_DN50416_c3_g1	Photoperiod
29	PIE1	TRINITY_DN69014_c0_g1	Photoperiod
30	PIE1	TRINITY_DN37446_c0_g1	Photoperiod
31	PIE1	TRINITY_DN34418_c1_g1	Photoperiod
32	PIE1	TRINITY_DN39810_c0_g1	Photoperiod
33	PIE1	TRINITY_DN22706_c0_g1	Photoperiod
34	PFT1	TRINITY_DN45483_c0_g6	Photoperiod
35	FPA	TRINITY_DN43102_c0_g3	Photoperiod
36	FTC	TRINITY_DN43717_c2_g3	Photoperiod
37	FTC	TRINITY_DN13071_c0_g1	Photoperiod
38	FTC	TRINITY_DN43717_c2_g1	Photoperiod
39	FTC	TRINITY_DN41988_c0_g3	Photoperiod
40	FT	TRINITY_DN44255_c2_g1	Photoperiod
41	FT	TRINITY_DN32835_c2_g7	Photoperiod
42	COL3	TRINITY_DN49680_c0_g1	Photoperiod
43	COL3	TRINITY_DN36089_c4_g1	Photoperiod
44	COL4	TRINITY_DN40889_c1_g1	Photoperiod
45	COL4	TRINITY_DN43287_c1_g1	Photoperiod
46	COL5	TRINITY_DN23463_c0_g1	Photoperiod
47	COL5	TRINITY_DN38990_c1_g1	Photoperiod
48	COL6	TRINITY_DN49284_c1_g4	Photoperiod
49	COL10	TRINITY_DN49092_c2_g2	Photoperiod
50	COL10	TRINITY_DN38465_c2_g2	Photoperiod
51	COL10	TRINITY_DN69277_c0_g1	Photoperiod
52	COL13	TRINITY_DN36067_c1_g1	Photoperiod
53	COL13	TRINITY_DN40496_c2_g1	Photoperiod
54	COL16	TRINITY_DN49284_c1_g1	Photoperiod
55	COL16	TRINITY_DN49284_c0_g1	Photoperiod
56	SPA3	TRINITY_DN21823_c0_g1	Photoperiod
57	SPA3	TRINITY_DN47605_c1_g5	Photoperiod
58	SPA3	TRINITY_DN47605_c1_g5	Photoperiod
59	SPA4	TRINITY_DN47461_c0_g1	Photoperiod
60	SPA	TRINITY_DN47461_c0_g3	Photoperiod
61	SPA	TRINITY_DN36485_c3_g1	Photoperiod
62	MBD1	TRINITY_DN44831_c0_g1	Photoperiod
63	MBD1	TRINITY_DN28702_c0_g1	Photoperiod
64	MBD2	TRINITY_DN28672_c3_g1	Photoperiod
65	MBD2	TRINITY_DN37200_c0_g1	Photoperiod
66	MBD4	TRINITY_DN34266_c1_g2	Photoperiod
67	MBD8	TRINITY_DN46125_c0_g1	Photoperiod
68	MBD9	TRINITY_DN50810_c5_g3	Photoperiod
69	MBD9	TRINITY_DN48021_c1_g3	Photoperiod
70	MBD9	TRINITY_DN48347_c2_g2	Photoperiod
71	MBD9	TRINITY_DN39579_c0_g1	Photoperiod
72	MBD9	TRINITY_DN26623_c0_g1	Photoperiod
73	MBD9	TRINITY_DN34500_c5_g1	Photoperiod
74	MAF1	TRINITY_DN61170_c0_g1	Photoperiod
75	NF-YB1	TRINITY_DN39068_c1_g2	Photoperiod
76	NF-YC6	TRINITY_DN31670_c0_g2	Photoperiod
77	NF-YC4	TRINITY_DN31670_c0_g7	Photoperiod
78	NF-YB8	TRINITY_DN38602_c0_g1	Photoperiod
79	NF-YB4	TRINITY_DN39068_c1_g1	Photoperiod
80	NF-YB2	TRINITY_DN44550_c0_g2	Photoperiod
81	NF-YC6	TRINITY_DN48526_c2_g4	Photoperiod
82	NF-YC4	TRINITY_DN31670_c0_g1	Photoperiod
83	NF-YC4	TRINITY_DN50989_c4_g1	Photoperiod
84	NF-YC4	TRINITY_DN50989_c4_g1	Photoperiod
85	NF-YC2	TRINITY_DN30297_c0_g6	Photoperiod
86	FHY3	TRINITY_DN33945_c0_g3	Photoperiod
87	FHY3	TRINITY_DN38123_c3_g3	Photoperiod
88	FHY3	TRINITY_DN46102_c1_g1	Photoperiod
89	PHYB	TRINITY_DN48422_c1_g1	Circadian clock
90	ADO1	TRINITY_DN45341_c0_g2	Circadian clock
91	ADO2	TRINITY_DN32163_c0_g1	Circadian clock
92	ADO2	TRINITY_DN45341_c0_g4	Circadian clock
93	ADO2	TRINITY_DN45341_c0_g1	Circadian clock
94	XCT	TRINITY_DN69421_c0_g1	Circadian clock
95	CRY	TRINITY_DN70109_c0_g1	Circadian clock
96	LWD1	TRINITY_DN38151_c0_g1	Circadian clock
97	GIGANTEA	TRINITY_DN48198_c1_g3	Circadian clock
98	CCA1	TRINITY_DN49210_c1_g1	Circadian clock
99	COP1	TRINITY_DN46660_c1_g1	Circadian clock
100	XCT	TRINITY_DN34975_c0_g1	Circadian clock
101	CIGR	TRINITY_DN37852_c1_g1	Gibberellin
102	CIGR	TRINITY_DN43292_c1_g3	Gibberellin
103	CIGR2	TRINITY_DN48840_c1_g2	Gibberellin
104	CIGR2	TRINITY_DN48840_c1_g1	Gibberellin
105	CIGR2	TRINITY_DN43292_c1_g5	Gibberellin
106	CIGR2	TRINITY_DN28799_c1_g1	Gibberellin
107	GID1L3	TRINITY_DN37317_c0_g3	Gibberellin
108	GID1L3	TRINITY_DN57091_c0_g1	Gibberellin
109	GID1L3	TRINITY_DN45909_c0_g1	Gibberellin
110	GID1L3	TRINITY_DN35601_c2_g3	Gibberellin
111	GID1	TRINITY_DN41496_c1_g2	Gibberellin
112	GID1	TRINITY_DN29695_c0_g1	Gibberellin
113	GID1	TRINITY_DN42789_c1_g1	Gibberellin
114	GID1L1	TRINITY_DN49764_c3_g1	Gibberellin
115	GA20ox	TRINITY_DN35589_c1_g3	Gibberellin
116	GA2OX6	TRINITY_DN40505_c2_g2	Gibberellin
117	GA2OX3	TRINITY_DN48759_c1_g3	Gibberellin
118	CCR2	TRINITY_DN34476_c0_g1	Autonomous
119	CCR2	TRINITY_DN46713_c0_g6	Autonomous
120	CCR2	TRINITY_DN42417_c0_g1	Autonomous
121	CCR2	TRINITY_DN33725_c4_g1	Autonomous
122	CCR2	TRINITY_DN37407_c0_g7	Autonomous
123	CCR2	TRINITY_DN41667_c0_g1	Autonomous
124	CCR2	TRINITY_DN30428_c2_g2	Autonomous
125	FCA	TRINITY_DN43717_c2_g3	Autonomous
126	FY	TRINITY_DN47399_c2_g2	Autonomous
127	FY	TRINITY_DN47399_c2_g3	Autonomous
128	FY	TRINITY_DN1118_c0_g1	Autonomous
129	FLK	TRINITY_DN34271_c0_g2	Autonomous
130	FLK	TRINITY_DN38433_c0_g1	Autonomous
131	FLK	TRINITY_DN42866_c0_g2	Autonomous
132	FLK	TRINITY_DN42866_c0_g3	Autonomous
133	FLD	TRINITY_DN56408_c0_g1	Autonomous
134	SPL	TRINITY_DN48199_c1_g1	Age pathway
135	SPL	TRINITY_DN21146_c0_g1	Age pathway
136	SPL	TRINITY_DN48199_c1_g3	Age pathway
137	SPL	TRINITY_DN48199_c1_g2	Age pathway
138	SPL	TRINITY_DN48199_c1_g4	Age pathway
139	FT/Hd3	TRINITY_DN33508_c4_g1	Central integrator
140	FT3	TRINITY_DN38561_c2_g1	Central integrator
141	FT	TRINITY_DN13097_c0_g2	Central integrator
142	FT	TRINITY_DN47494_c1_g1	Central integrator
143	FT	TRINITY_DN34261_c0_g5	Central integrator
144	HD3	TRINITY_DN34261_c0_g3	Central integrator
145	HD3	TRINITY_DN39085_c0_g1	Central integrator
146	HD3	TRINITY_DN39085_c0_g2	Central integrator
147	HD3	TRINITY_DN13097_c0_g1	Central integrator
148	HD3	TRINITY_DN32835_c2_g4	Central integrator
149	HD3	TRINITY_DN49818_c3_g4	Central integrator
150	HD3	TRINITY_DN33508_c4_g1	Central integrator
151	HD3	TRINITY_DN28366_c0_g1	Central integrator
152	SOC1	TRINITY_DN31738_c2_g2	Central integrator
153	SOC1	TRINITY_DN43311_c1_g1	Central integrator
154	FLC	TRINITY_DN36927_c4_g1	Central integrator
155	FLC	TRINITY_DN30763_c0_g1	Central integrator
156	FLC	TRINITY_DN42508_c0_g4	Central integrator
